# Supplementary material for: Detection of tyrosine and monitoring tyrosinase activity using an enzyme cascade-triggered colorimetric reaction
Source: Royal Society of Chemistry journal article supplement (doi:10.1039/d0ra05581f), 2020-01-01
Supplement: d0ra05581f1.pdf [file d0ra05581f1.pdf]

## **Supporting information**

### **Detection of tyrosine and monitoring tyrosinase activity using an enzyme cascade-triggered colorimetric reaction**

Huei-Yu Chen<sup>a</sup> and Yi-Chun Yeh<sup>a\*</sup>

<sup>a</sup>*Department of Chemistry, National Taiwan Normal University, Taiwan*

**Table S1 Betalamic acid for the detection of Tyr in artificial urine**

| Tyr                     |                         | 10% AU  |              |
|-------------------------|-------------------------|---------|--------------|
| Added ( $\mu\text{M}$ ) | Found ( $\mu\text{M}$ ) | RSD (%) | Recovery (%) |
| 20                      | 19.18                   | 3.01    | 95.90        |
| 40                      | 40.55                   | 0.18    | 101.39       |
| 80                      | 73.26                   | 1.88    | 91.85        |
| 100                     | 88.85                   | 1.20    | 88.85        |

**Table S2 2-AIPA-BX for the detection of Tyr in artificial urine**

| Tyr                     |                         | 10% AU  |              |
|-------------------------|-------------------------|---------|--------------|
| Added ( $\mu\text{M}$ ) | Found ( $\mu\text{M}$ ) | RSD (%) | Recovery (%) |
| 5                       | 5.02                    | 26.58   | 100.39       |
| 10                      | 12.09                   | 2.53    | 120.89       |
| 15                      | 12.57                   | 5.23    | 117.12       |
| 20                      | 22.69                   | 8.21    | 113.47       |

**Table S3 Comparison of various methods for the detection of Tyr**

| <b>Method</b>                                             | <b>Linear Range<br/>(<math>\mu\text{M}</math>)</b> | <b>LOD<br/>(<math>\mu\text{M}</math>)</b> | <b>Analysis<br/>duration</b> | <b>Ref.</b>  |
|-----------------------------------------------------------|----------------------------------------------------|-------------------------------------------|------------------------------|--------------|
| <b>Fluorometric Assay</b>                                 | 0.11-11                                            | 0.068                                     | 30 min                       | 1            |
| <b>Quenching-Chemiluminescence</b>                        | 0.2-20                                             | 0.181                                     | 3 min                        | 2            |
| <b>Phenylalanine Ammonia-Lyase<br/>Assay</b>              | 80-640                                             | 5.0                                       | 2 h                          | 3            |
| <b>Enzyme Cascade-triggered<br/>Colorimetric Reaction</b> | 5-100                                              | 1.102                                     | 30 min                       | This<br>work |

**Table S4 Comparison of various methods for the detection of tyrosinase**

| <b>Method</b>                                             | <b>Linear Range<br/>(U/mL)</b> | <b>LOD<br/>(U/mL)</b> | <b>Analysis<br/>duration</b> | <b>Ref.</b>  |
|-----------------------------------------------------------|--------------------------------|-----------------------|------------------------------|--------------|
| <b>Electrochemical Sensor</b>                             | 2.5-10                         | 1                     | 20 min                       | 4            |
| <b>Fluorometric Assay</b>                                 | 0.40-7.0                       | 0.10                  | 2 h                          | 5            |
| <b>Colorimetric Assay</b>                                 | 0.5-2.5                        | 0.5                   | 1 h                          | 6            |
| <b>Enzyme Cascade-Triggered<br/>Colorimetric Reaction</b> | 1-10                           | 0.072                 | 1 h                          | This<br>work |

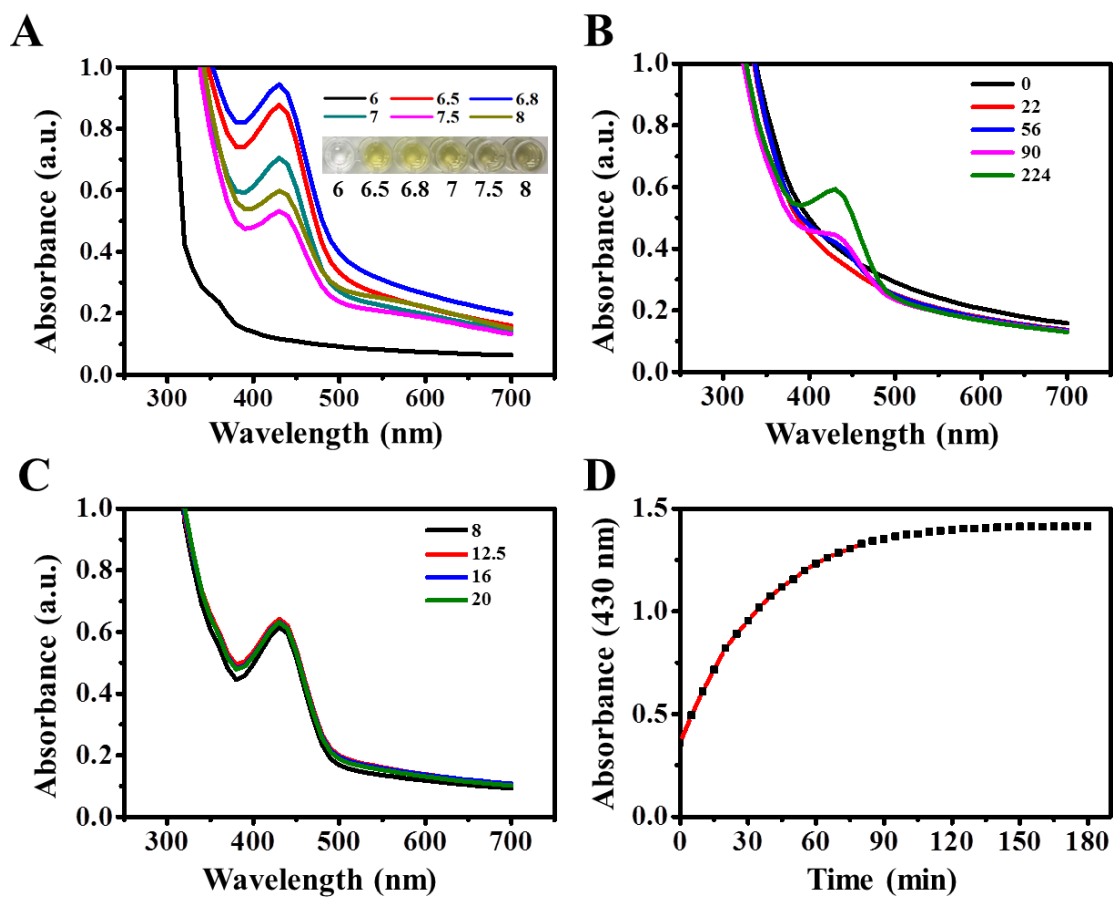

**Figure S1** (A) Enzyme cascade reaction mixture was assessed under various pH values with Tyr at 100  $\mu\text{M}$ . (B) Absorption spectra of the reaction mixtures were recorded with various concentrations of tyrosinase (0, 22, 56, 90, and 224  $\mu\text{M}$ ) and DOD at 8  $\mu\text{M}$ . (C) Absorption spectra of the reaction mixtures were recorded with various concentrations of DOD (8, 12.5, 16, and 20  $\mu\text{M}$ ) and tyrosinase at 224  $\mu\text{M}$ . (D) Absorbance intensities at 430 nm over reaction time-course in the presence of Tyr at 100  $\mu\text{M}$ .

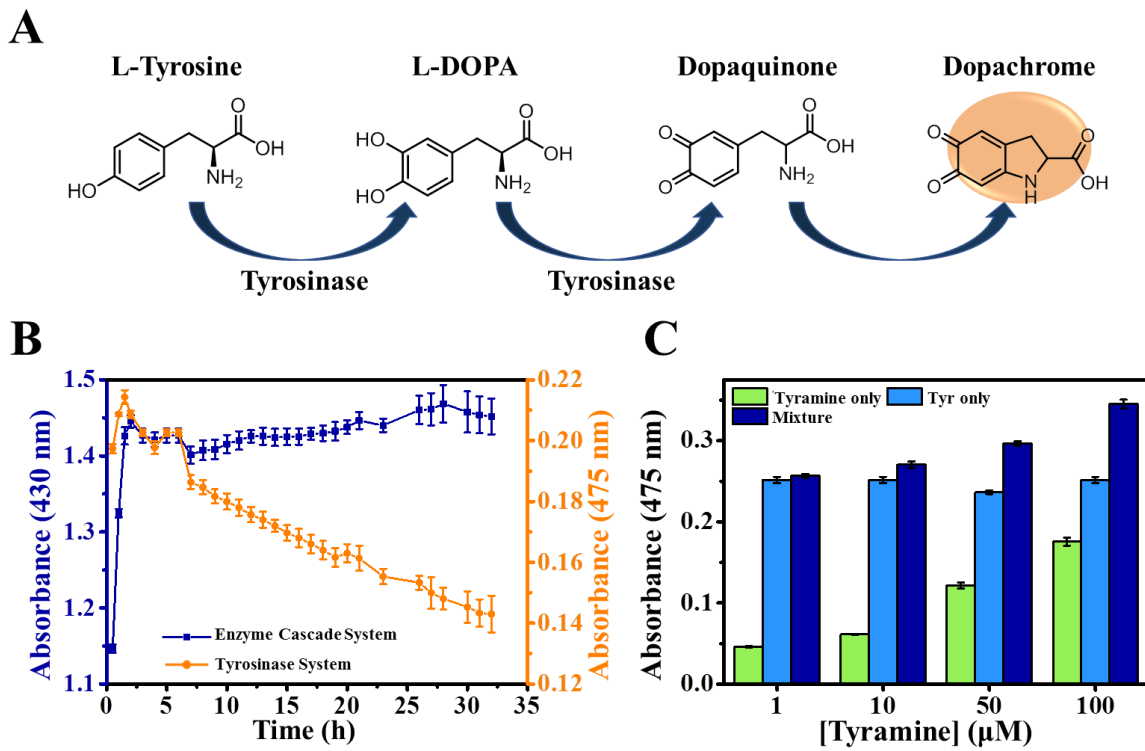

**Figure S2** (A) Schematic diagram of dopachrome synthesis. (B) Absorbance intensities at 430 nm (blue line) of the enzyme cascade system and at 475 nm (orange line) of tyrosinase system over reaction time-course in the presence of Tyr at 100  $\mu\text{M}$ . (C) The intensities of  $\lambda_{475}$  in the co-presence of 100  $\mu\text{M}$  Tyr and 1/10/50/100  $\mu\text{M}$  tyramine.

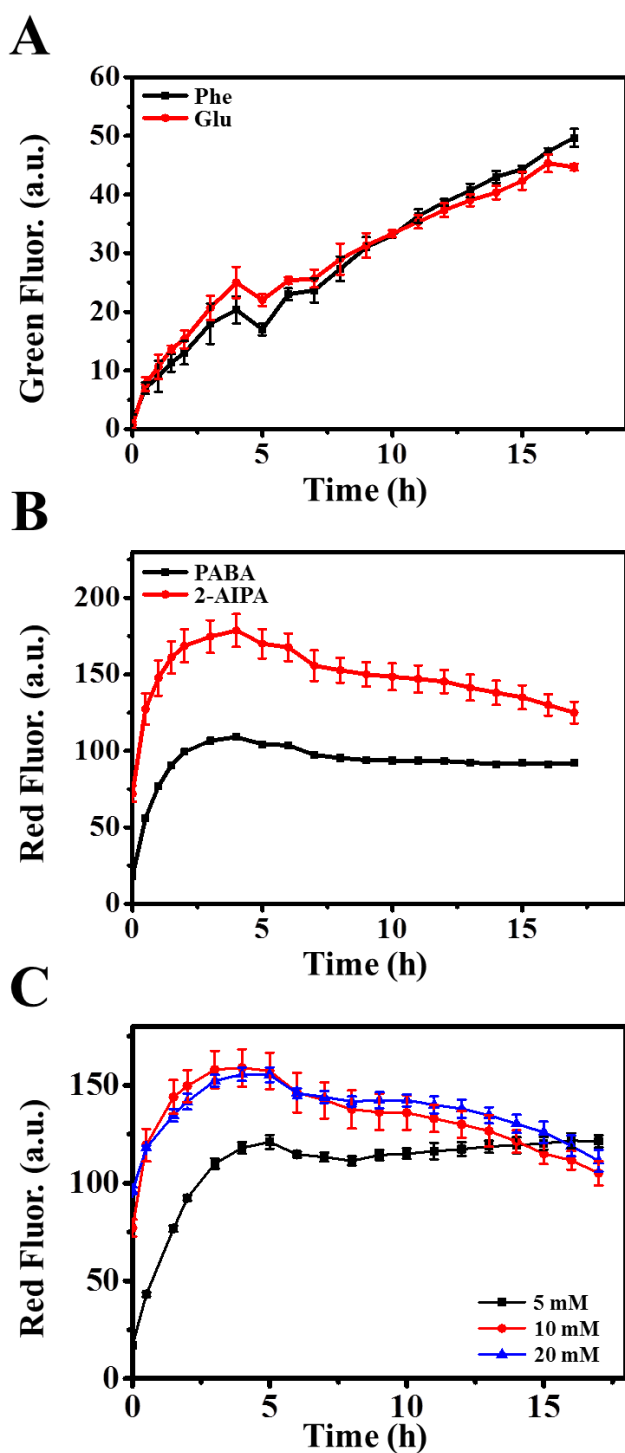

**Figure S3** (A) The green fluorescence intensities of Phe- and Glu-betaxathins and (B) the red fluorescence intensities of PABA- and 2-AIPA-betaxanthins at various time points over the reactions. Tyr solution (50  $\mu$ M) was mixed with amines at 10 mM for the production of betaxanthin molecules. (C) The red intensities of 2-AIPA-betaxanthins with various concentrations of 2-AIPA (5, 10, and 20 mM) over reaction time-course of enzyme cascade in the presence of Tyr at 50  $\mu$ M.

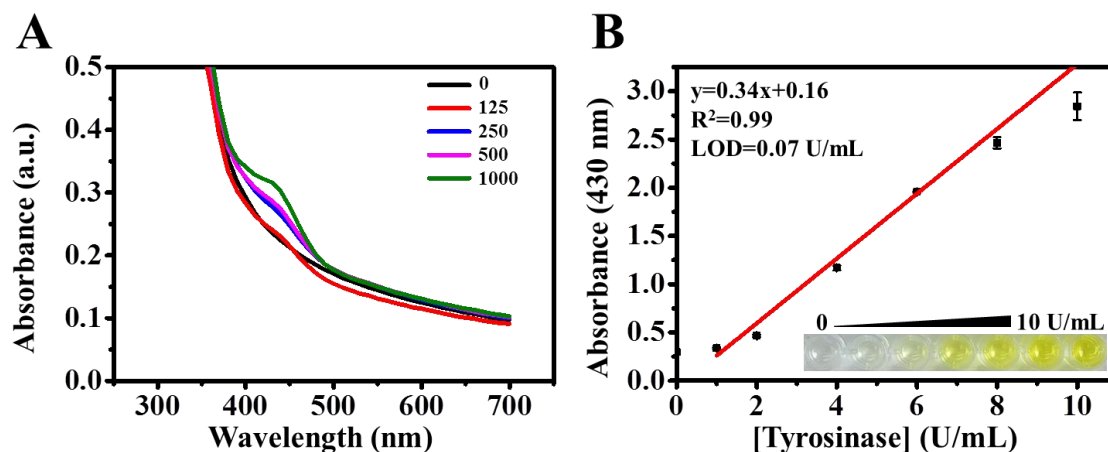

**Figure S4** (A) Absorption spectra of the reaction mixtures were recorded with various concentrations of Tyr (0, 125, 250, 500, and 1000  $\mu\text{M}$ ) in the presence of DOD at 12.5  $\mu\text{M}$  and tyrosinase at 1.5 U/mL after incubation for a period of 1 h. (B) The linear range for tyrosinase was between 1 and 10 U/mL, and LOD was 0.07 U/mL. The corresponding photograph under the natural light in the presence of tyrosinase.

## References

1. W. Wei, H.-J. Wang, C.-Q. Jiang and J.-M. Shi, *Chinese Journal of Analytical Chemistry*, 2007, **35**, 1772–1775.
2. T. Ohtomo, S. Igarashi, Y. Takagai and O. Ohno, *Journal of analytical methods in chemistry*, 2012, **2012**.
3. F. Wibrand, *Clinica chimica acta*, 2004, **347**, 89–96.
4. H. B. Yildiz, R. Freeman, R. Gill and I. Willner, *Analytical chemistry*, 2008, **80**, 2811–2816.
5. G. Liu, J. Zhao, S. Lu, S. Wang, J. Sun and X. Yang, *ACS sensors*, 2018, **3**, 1855–1862.
6. H.-H. Deng, X.-L. Lin, S.-B. He, G.-W. Wu, W.-H. Wu, Y. Yang, Z. Lin, H.-P. Peng, X.-H. Xia and W. Chen, *Microchimica Acta*, 2019, **186**, 301.
